# Supplementary material for: Assessment of Luminal and Basal Phenotypes in Bladder Cancer
Source: PubMed Central journal article supplement (PMC7298008; doi:10.1038/s41598-020-66747-7), 2020-06-16
Supplement: 41598_2020_66747_MOESM2_ESM.pdf [file 41598_2020_66747_MOESM2_ESM.pdf]

**Supplementary Table 5. Immunohistochemical Results on Routine Histologic Tissue Sections of Bladder Cancer (n=74)**

| <b>Markers</b>       | <b>Luminal (59)</b> | <b>Basal (13)</b> | <b>Double Negative (2)</b> | <b>Total (74)</b> |
|----------------------|---------------------|-------------------|----------------------------|-------------------|
| GATA-3 positive only | 48 (82%)            | 0                 | 0                          | 48                |
| KRT5/6 positive only | 0                   | 11 (85%)          | 1 (50%)                    | 12                |
| Double positive      | 2 (3%)              | 2 (15%)           | 0                          | 4                 |
| Double negative      | 9 (15%)             | 0                 | 1 (50%)                    | 10                |
