# Supplementary material for: Assessment of Luminal and Basal Phenotypes in Bladder Cancer
Source: PubMed Central journal article supplement (PMC7298008; doi:10.1038/s41598-020-66747-7), 2020-06-16
Supplement: 41598_2020_66747_MOESM3_ESM.pdf [file 41598_2020_66747_MOESM3_ESM.pdf]

Supplementary Table 2: Summary of Clinical and Pathological Data (MDACC fresh frozen cohort; n=132)

| Sample | Molecular subtype | Gender  | Race   | Age              | Grade | Invasiveness | Pathologic stage | Follow up (months) | Current status (alive w/o disease, dead from disease, dead from other causes), NA | Smoking status    |            | p53 Mutations    |             |                                     |
|--------|-------------------|---------|--------|------------------|-------|--------------|------------------|--------------------|-----------------------------------------------------------------------------------|-------------------|------------|------------------|-------------|-------------------------------------|
|        |                   |         |        |                  |       |              |                  |                    |                                                                                   | Smoking status    | Pack a day | Years of smoking | Nucleotides | Amino Acids                         |
| 1      | MDA115            | Luminal | male   | Caucasion        | 65.42 | High         | yes              | T3N0M0             | 60.72                                                                             | alive w/o disease | No-Smoker  | NA               | NA          |                                     |
| 2      | MDA94             | Luminal | male   | Caucasion        | 57.52 | High         | yes              | T2N0M0             | 145.05                                                                            | alive w/o disease | No-Smoker  | NA               | NA          | c.839G>C, c.853G>A p.R280T, p.E285K |
| 3      | MDA62             | Luminal | male   | African American | 62.74 | High         | yes              | T1N0M0             | 12.10                                                                             | dead from other   | Active     | 1 pack           | 44          |                                     |
| 4      | MDA44*            | Luminal | male   | Caucasion        | 60.63 | High         | yes              | T1N0M0             | 23.15                                                                             | dead              | Active     | 1 1/2 packs      | NA          | c.811G>A p.E271K                    |
| 5      | MDA7              | Luminal | male   | Caucasion        | 62.79 | High         | yes              | T1N0M0             | 161.80                                                                            | dead              | Former     | 48-pack-year     | 45          |                                     |
| 6      | MDA150*           | Luminal | female | Caucasion        | 68.58 | High         | yes              | T2N0M0             | 137.02                                                                            | alive w/o disease | Former     | 2-1/2 packs      | NA          | c.473G>A p.R158H                    |
| 7      | MDA32*            | Luminal | male   | Caucasian        | 69.49 | Low          | no               | TaN0M0             | 0.43                                                                              | alive w/o disease | No-Smoker  | NA               | 8           |                                     |
| 8      | MDA20             | Luminal | male   | Caucasion        | 78.96 | High         | yes              | T3N0M0             | 41.44                                                                             | dead              | Former     | 7 cigarettes     | 50          |                                     |
| 9      | MDA97*            | Luminal | male   | Hispanic         | 67.65 | High         | yes              | T2N0M0             | 94.75                                                                             | dead              | Active     | 1 pack           | 47          |                                     |
| 10     | MDA114*           | Luminal | female | Caucasion        | 68.90 | High         | yes              | T3N0M0             | 33.34                                                                             | dead              | Former     | 2 pack           | 9           | c.976G>A p.E326K                    |
| 11     | MDA27*            | Luminal | female | Caucasion        | 35.72 | Low          | no               | TaN0M0             | 53.11                                                                             | dead              | Former     | NA               |             |                                     |
| 12     | MDA110*           | Luminal | male   | Caucasion        | 81.76 | High         | yes              | T4N1M0             | 69.77                                                                             | dead              | No-Smoker  | NA               | NA          |                                     |
| 13     | MDA103*           | Luminal | male   | Caucasion        | 59.04 | High         | yes              | T4N0M0             | 116.39                                                                            | dead from other   | Active     | 2 packs          | NA          | c.589G>A p.V197M                    |
| 14     | MDA50             | Luminal | female | African American | 70.42 | High         | yes              | T2N1M0             | 51.74                                                                             | dead              | No         |                  | NA          |                                     |
| 15     | MDA24             | Luminal | male   | Caucasion        | 66.80 | High         | yes              | T3N1M0             | 105.28                                                                            | dead              | Former     | 80 pack-year     | NA          | c.839G>A p.R280K                    |
| 16     | MDA101*           | Luminal | male   | Caucasion        | 82.52 | High         | yes              | T1N0M0             | 96.66                                                                             | dead              | Former     | 20 pack year     | NA          |                                     |
| 17     | MDA2*             | Luminal | male   | Caucasion        | 74.48 | High         | yes              | T2N1M0             | 37.15                                                                             | dead              | No-Smoker  | NA               | NA          |                                     |
| 18     | MDA106*           | Luminal | female | Caucasian        | 68.04 | High         | yes              | T1N0M0             | 29.70                                                                             | alive w/o disease | Active     | 30-40 pack years | NA          | c.473G>A p.R158H                    |
| 19     | MDA131*           | Luminal | male   | Caucasian        | 58.76 | Low          | no               | TaN0M0             | 47.34                                                                             | alive w/o disease | Former     | 20-pack-year     | 4           |                                     |
| 20     | MDA36*            | Luminal | male   | African American | 54.01 | Low          | yes              | T1N0M0             | 125.54                                                                            | dead              | Former     | NA               | NA          |                                     |
| 21     | MDA6              | Luminal | female | Caucasian        | 47.57 | Low          | no               | TaN0M0             | 146.16                                                                            | alive w/o disease | No-Smoker  | NA               | 45          |                                     |
| 22     | MDA139            | Luminal | male   | Caucasian        | 69.07 | High         | yes              | T1N0M0             | 2.23                                                                              | alive w/o disease | Active     | 1 and half pack  | 30          |                                     |
| 23     | MDA105            | Luminal | male   | African American | 70.36 | Low          | no               | TaN0M0             | 9.93                                                                              | dead              | Former     | 1-half pack      | NA          |                                     |
| 24     | MDA82             | Luminal | female | Caucasian        | 69.11 | Low          | no               | TaN0M0             | 142.36                                                                            | alive w/o disease | Former     | NA               | 13          |                                     |
| 25     | MDA132            | Luminal | male   | Caucasian        | 63.35 | High         | yes              | T4N0M1             | 47.18                                                                             | dead from disease | Active     | 1 pack           | 25          |                                     |
| 26     | MDA35*            | Luminal | male   | Caucasian        | 65.72 | Low          | no               | TaN0M0             | 148.23                                                                            | alive w/o disease | Former     | 1 pack           | NA          |                                     |
| 27     | MDA9              | Luminal | male   | Caucasian        | 87.21 | High         | yes              | T1N0M0             | 95.70                                                                             | dead              | No-Smoker  | NA               | 54          |                                     |
| 28     | MDA127*           | Luminal | male   | Caucasian        | 67.83 | Low          | no               | TaN0M0             | 2.89                                                                              | alive w/o disease | Former     | 2 packs a day    | NA          |                                     |
| 29     | MDA138*           | Luminal | male   | Caucasian        | 54.13 | Low          | no               | TaN0M0             | 122.85                                                                            | alive w/o disease | Former     | 30 pack years    | NA          |                                     |
| 30     | MDA90*            | Luminal | male   | Caucasion        | 55.76 | High         | yes              | TON0M0             | 100.46                                                                            | daed              | No-Smoker  | NA               | NA          |                                     |
| 31     | MDA142*           | Luminal | male   | Hispanic         | 53.79 | Low          | no               | TON0M0             | 41.44                                                                             | alive w/o disease | Active     | 1 pack           | 34          |                                     |
| 32     | MDA18             | Luminal | male   | Caucasian        | 68.80 | High         | yes              | T1N0M0             | 58.62                                                                             | dead from disease | Former     | 2 packs a day    | NA          |                                     |
| 33     | MDA10*            | Luminal | male   | Hispanic         | 68.10 | High         | yes              | T1N0M0             | 2.46                                                                              | dead from other   | No-Smoker  | NA               | 4           |                                     |
| 34     | MDA137*           | Luminal | male   | Caucasian        | 64.80 | High         | yes              | T2N1M0             | 1.57                                                                              | dead              | Former     | 1 pack           | NA          |                                     |
| 35     | MDA146*           | Luminal | female | Caucasion        | 69.99 | High         | yes              | T1N0M0             | 50.07                                                                             | dead              | No-Smoker  | NA               | 30          |                                     |
| 36     | MDA135            | Luminal | male   | Hispanic         | 62.88 | High         | yes              | T1N0M0             | 106.75                                                                            | alive             | Former     | 1 pack           | NA          |                                     |

Supplementary Table 2: Summary of Clinical and Pathological Data (MDACC fresh frozen cohort; n=132)

| Sample | Molecular subtype | Gender  | Race   | Age              | Grade | Invasiveness | Pathologic stage | Follow up (months) | Current status (alive w/o disease, dead from disease, dead from other causes), NA | Smoking status       |            | Years of smoking            | p53 Mutations |                    |                  |
|--------|-------------------|---------|--------|------------------|-------|--------------|------------------|--------------------|-----------------------------------------------------------------------------------|----------------------|------------|-----------------------------|---------------|--------------------|------------------|
|        |                   |         |        |                  |       |              |                  |                    |                                                                                   | Smoking status       | Pack a day |                             | Nucleotides   | Amino Acids        |                  |
| 37     | MDA56*            | Luminal | female | Caucasian        | 92.40 | High         | yes              | T1N0M0             | 66.62                                                                             | dead                 | No-Smoker  | NA                          | NA            | c.455dup           | p.P153Afs*28     |
| 38     | MDA102*           | Luminal | male   | Caucasian        | 58.68 | High         | yes              | T1N0M0             | 24.49                                                                             | alive w/o disease    | No-Smoker  | NA                          | NA            | c.796C>A           | p.G266R          |
| 39     | MDA107*           | Luminal | male   | Caucasian        | 72.97 | High         | no               | T1N0M0             | 37.38                                                                             | alive w/o disease    | No-Smoker  | NA                          | 43            |                    |                  |
| 40     | MDA129*           | Luminal | male   | Caucasian        | 72.45 | High         | yes              | T2N0M0             | 52.30                                                                             | dead                 | Active     | 1 pack                      | NA            | c.473G>A           | p.R158H          |
| 41     | MDA55*            | Luminal | male   | Caucasian        | 76.34 | High         | yes              | T4N2M0             | 18.36                                                                             | dead                 | No-Smoker  | NA                          | NA            |                    |                  |
| 42     | MDA67             | Luminal | female | Caucasian        | 86.17 | High         | yes              | T1N0M0             | 44.95                                                                             | dead                 | Active     | 59-pack year                | NA            |                    |                  |
| 43     | MDA26*            | Luminal | male   | Caucasian        | 75.47 | High         | no               | TaN1M0             | 125.02                                                                            | alive w/o disease    | No-Smoker  | NA                          | NA            |                    |                  |
| 44     | MDA104*           | Luminal | male   | Hispanic         | 65.67 | High         | yes              | TONOM0             | 121.25                                                                            | alive w/o disease    | No-Smoker  | NA                          | NA            | c.637C>T, c.639A>G | p.R213*, p.R213= |
| 45     | MDA119            | Luminal | male   | Caucasian        | 68.99 | High         | yes              | T4N0M0             | 131.80                                                                            | alive w/o disease    | Former     | 25-pack-years               | NA            | c.993G>C           | p.Q331H          |
| 46     | MDA123*           | Luminal | female | Caucasian        | 77.78 | Low          | no               | TaNOM0             | 55.31                                                                             | alive w/o disease    | No-Smoker  | NA                          | 40            |                    |                  |
| 47     | MDA19*            | Luminal | male   | Caucasian        | 65.59 | Low          | yes              | T1N0M0             | 170.33                                                                            | dead                 | Active     | NA                          | NA            |                    |                  |
| 48     | MDA28*            | Luminal | male   | Caucasian        | 49.62 | Low          | yes              | T1N0M0             | 16.10                                                                             | dead from other      | No-Smoker  | NA                          | 42            |                    |                  |
| 49     | MDA65             | Luminal | male   | African American | 58.53 | Low          | no               | T1N0M0             | 26.43                                                                             | dead                 | Active     | 5 cigarettes to 1-1/2 packs | NA            |                    |                  |
| 50     | MDA78*            | Luminal | male   | hispanic         | 54.51 | Low          | yes              | T1N0M0             | 93.77                                                                             | alive                | Active     | 12 pack years               | NA            |                    |                  |
| 51     | MDA23*            | Luminal | female | Caucasian        | 84.95 | Low          | no               | TaNOM0             | 12.33                                                                             | dead                 | No-Smoker  | NA                          | NA            |                    |                  |
| 52     | MDA148*           | Luminal | male   | Caucasian        | 57.90 | Low          | no               | TaNOM0             | 26.03                                                                             | alive w/o disease    | Active     | 20 pack years               | 22            |                    |                  |
| 53     | MDA145*           | Luminal | male   | Hispanic         | 57.42 | High         | yes              | T3N0M0             | 38.92                                                                             | alive w/o disease    | Active     | 1 pack                      | 23            |                    |                  |
| 54     | MDA21*            | Luminal | male   | Caucasian        | 67.97 | Low          | no               | TaNOM0             | 118.95                                                                            | alive w/o disease    | Active     | 1 pack a day                | NA            |                    |                  |
| 55     | MDA22             | Luminal | male   | Caucasian        | 67.97 | Low          | no               | TaNOM0             | 64.30                                                                             | dead from other      | Active     | 1/2 pack to 1 pack          | NA            |                    |                  |
| 56     | MDA130*           | Luminal | female | Caucasian        | 42.53 | High         | yes              | T3N0M0             | 191.34                                                                            | alive                | Active     | NA                          | 27            |                    |                  |
| 57     | MDA4*             | Luminal | male   | Caucasian        | 44.14 | High         | yes              | TONOM0             | 59.90                                                                             | alive w/o disease    | Former     | 1 pack                      | NA            | c.398T>A           | p.M133K          |
| 58     | MDA87             | Luminal | male   | Caucasian        | 73.01 | High         | no               | T1N0M0             | 12.03                                                                             | dead from other      | Former     | 90-pack year                | 30            |                    |                  |
| 59     | MDA75             | Luminal | female | Caucasian        | 74.79 | Low          | no               | TaNOM0             | 34.07                                                                             | dead                 | Active     | 1 pack                      | NA            |                    |                  |
| 60     | MDA86             | Luminal | male   | Caucasian        | 80.00 | Low          | no               | NA                 | NA                                                                                | NA                   | NA         | NA                          | NA            |                    |                  |
| 61     | MDA79*            | Luminal | male   | Caucasian        | 40.95 | Low          | no               | TaNOM0             | 25.84                                                                             | alive w/o disease    | No-Smoker  | NA                          | 40            |                    |                  |
| 62     | MDA1*             | Luminal | male   | Caucasian        | 69.15 | Low          | no               | TaNOM1             | 99.70                                                                             | alive w/o disease    | Active     | 1 pack                      | 29            |                    |                  |
| 63     | MDA52             | Luminal | male   | Caucasian        | 56.02 | High         | yes              | T1N0M0             | 50.43                                                                             | dead                 | Former     | 1 pack                      | 57            |                    |                  |
| 64     | MDA37*            | Luminal | female | Caucasian        | 75.90 | Low          | no               | TaNOM1             | 32.43                                                                             | dead                 | Active     | 1 pack                      | NA            | c.108G>A, c.215C>G | p.P36=, p.P72R   |
| 65     | MDA64*            | Luminal | female | Hispanic         | 57.74 | High         | yes              | T1N0M0             | 15.77                                                                             | dead from disease    | No-Smoker  | NA                          | 30            |                    |                  |
| 66     | MDA126            | Luminal | male   | Caucasian        | 51.30 | High         | yes              | TONOM0             | 116.13                                                                            | alive w/o disease    | Active     | 1 pack                      | NA            |                    |                  |
| 67     | MDA124*           | Luminal | male   | African American | 53.35 | High         | yes              | T1N0M0             | 39.67                                                                             | alive w/o disease    | No-Smoker  | NA                          | 30            |                    |                  |
| 68     | MDA8*             | Luminal | male   | Caucasian        | 82.89 | High         | yes              | T2N0M0             | 7.54                                                                              | dead from disease    | Former     | 1/2 pack                    | NA            |                    |                  |
| 69     | MDA95*            | Luminal | male   | Caucasian        | 71.46 | High         | yes              | T3N0M0             | 146.39                                                                            | alive w/o disease    | No-Smoker  | NA                          | NA            |                    |                  |
| 70     | MDA121*           | Luminal | male   | Caucasian        | 65.65 | Low          | no               | TaNOM0             | 132.16                                                                            | alive w/o disease    | No-Smoker  | NA                          | 42            |                    |                  |
| 71     | MDA122            | Luminal | male   | Caucasian        | 57.05 | Low          | no               | TaNOM0             | 73.21                                                                             | alive withot disease | Active     | 4 packs a day               | 30            |                    |                  |
| 72     | MDA71*            | Luminal | female | Caucasian        | 67.13 | High         | yes              | T3N1M0             | 12.79                                                                             | dead from disease    | Active     | 1-1/2 pack                  | NA            |                    |                  |

Supplementary Table 2: Summary of Clinical and Pathological Data (MDACC fresh frozen cohort; n=132)

| Sample | Molecular subtype | Gender  | Race   | Age              | Grade | Invasiveness | Pathologic stage | Follow up (months) | Current status (alive w/o disease, dead from disease, dead from other causes), NA | Smoking status         |            | Years of smoking    | p53 Mutations |                    |                  |
|--------|-------------------|---------|--------|------------------|-------|--------------|------------------|--------------------|-----------------------------------------------------------------------------------|------------------------|------------|---------------------|---------------|--------------------|------------------|
|        |                   |         |        |                  |       |              |                  |                    |                                                                                   | Smoking status         | Pack a day |                     | Nucleotides   | Amino Acids        |                  |
| 73     | MDA25             | Luminal | male   | Caucasian        | 83.29 | Low          | no               | TaNOM0             | 114.46                                                                            | dead from other        | Former     | 23 pack-year        | 50            | c.839G>C           | p.R280T          |
| 74     | MDA60             | Luminal | male   | Caucasian        | 66.35 | High         | yes              | T3NOM0             | 25.21                                                                             | dead                   | Yes        | 1-1/2 pack          | NA            |                    |                  |
| 75     | MDA147            | Luminal | male   | Caucasian        | 44.94 | High         | no               | TisNOM0            | 114.75                                                                            | dead from disease      | No-Smoker  | NA                  | NA            |                    |                  |
| 76     | MDA46             | Luminal | male   | Caucasian        | 73.54 | High         | yes              | T3N1M0             | 46.20                                                                             | dead from disease      | Active     | 40-pack-year        | 53            | c.853G>A           | p.E285K          |
| 77     | MDA92             | Luminal | male   | Caucasian        | 73.23 | High         | yes              | TONOM0             | 21.87                                                                             | dead from other        | Former     | 1-3 packs           | 52            |                    |                  |
| 78     | MDA96             | Luminal | male   | Caucasian        | 70.70 | High         | yes              | T1NOM0             | 136.36                                                                            | alive w/o disease      | Active     | 1-pack              | NA            |                    |                  |
| 79     | MDA98             | Luminal | male   | Caucasian        | 65.26 | Low          | no               | TaNOM0             | 30.66                                                                             | alive                  | No-Smoker  | NA                  | 21            |                    |                  |
| 80     | MDA140            | Luminal | male   | Caucasian        | 71.95 | High         | yes              | T3N1M0             | 8.69                                                                              | dead from disease      | Former     | 1 pack              | NA            |                    |                  |
| 81     | MDA113*           | Luminal | male   | Caucasian        | 77.45 | High         | yes              | T1NOM0             | 142.33                                                                            | alive w/o disease      | Former     | 15 pack-year        | NA            |                    |                  |
| 82     | MDA89*            | Luminal | male   | Caucasian        | 78.98 | High         | yes              | T2NOM0             | 18.49                                                                             | alive w/o disease      | Former     | 40-pack-year        | NA            |                    |                  |
| 83     | MDA88*            | Luminal | male   | Caucasian        | 75.36 | Low          | no               | TaNOM0             | 116.43                                                                            | dead                   | Active     | 60-pack-year        | NA            |                    |                  |
| 84     | MDA111*           | Luminal | male   | Caucasian        | 83.06 | High         | yes              | T2NOM0             | 89.38                                                                             | dead                   | Active     | 22 pack year        | 33            |                    |                  |
| 85     | MDA29*            | Luminal | male   | Caucasian        | 51.25 | Low          | no               | TaNOM0             | 46.85                                                                             | alive w/o disease      | Former     | 2 packs             | NA            |                    |                  |
| 86     | MDA108            | Luminal | female | Caucasian        | 67.82 | High         | yes              | T1N1M0             | 51.57                                                                             | alive w/o disease      | No-Smoker  | NA                  | 30            |                    |                  |
| 87     | MDA149            | Luminal | male   | Caucasian        | 75.68 | High         | yes              | T3N1M0             | 16.85                                                                             | dead                   | Active     | 2 pack              | NA            |                    |                  |
| 88     | MDA38*            | Luminal | male   | Caucasian        | 53.66 | High         | yes              | T3NOM0             | 241.11                                                                            | dead                   | No-Smoker  | NA                  | 60            |                    |                  |
| 89     | MDA85*            | Luminal | male   | Caucasian        | 81.24 | High         | yes              | T3NOM0             | 50.00                                                                             | dead                   | Former     | 2 packs             | 40            |                    |                  |
| 90     | MDA74*            | Luminal | male   | Caucasian        | 73.67 | High         | yes              | T3bNOM0            | 81.31                                                                             | dead                   | Active     | 2 packs             | 44            |                    |                  |
| 91     | MDA141            | Luminal | male   | Caucasian        | 62.29 | High         | yes              | T3N1M0             | 71.15                                                                             | alive w/o disease      | Active     | 30 cigarettes a day | NA            |                    |                  |
| 92     | MDA41             | Luminal | female | Caucasian        | 64.85 | Low          | no               | TaNOM0             | 105.64                                                                            | alive w/o disease      | No-Smoker  | NA                  | 40            |                    |                  |
| 93     | MDA47             | Basal   | male   | African American | 55.68 | High         | yes              | T1NOM0             | 60.62                                                                             | alive w/o disease      | Former     | 1 pack              | 29            |                    |                  |
| 94     | MDA54*            | Basal   | male   | Caucasian        | 66.96 | High         | yes              | T2NOM1             | 15.77                                                                             | dead from disease      | Active     | 10 cigarettes       | NA            |                    |                  |
| 95     | MDA120            | Basal   | female | African American | 69.11 | High         | yes              | T3N2M0             | 6.20                                                                              | dead from disease      | Active     | 12-pack-year        | NA            | c.403del           | p.C135Afs*35     |
| 96     | MDA12             | Basal   | male   | Caucasian        | 40.87 | High         | yes              | T2NOM0             | 25.41                                                                             | dead from disease      | Active     | 16 pack year        | NA            | c.743G>A           | p.R249Q          |
| 97     | MDA59*            | Basal   | male   | Caucasian        | 62.93 | High         | yes              | T2N2M1             | 15.93                                                                             | alive with disease     | No-Smoker  | NA                  | 10            |                    |                  |
| 98     | MDA51*            | Basal   | male   | Caucasian        | 84.22 | High         | yes              | T3NOM0             | 7.97                                                                              | dead                   | Active     | NA                  | 40            |                    |                  |
| 99     | MDA134*           | Basal   | male   | Caucasian        | 67.98 | High         | yes              | T2N1M0             | 4.95                                                                              | dead from disease      | Active     | 1 pack              | NA            |                    |                  |
| 100    | MDA77*            | Basal   | male   | Caucasian        | 88.93 | High         | yes              | T3NOM0             | 3.61                                                                              | dead from other causes | No-Smoker  | NA                  | 24            | c.839G>C           | p.R280T          |
| 101    | MDA14             | Basal   | male   | Caucasian        | 54.70 | High         | yes              | T2N1M0             | 68.69                                                                             | dead from other causes | Active     | 1 pack              | NA            | c.659A>G, c.853G>A | p.Y220C, p.E285K |
| 102    | MDA133*           | Basal   | male   | Caucasian        | 65.38 | High         | yes              | TONOM0             | 85.05                                                                             | alive w/o disease      | No-Smoker  | NA                  | 50            |                    |                  |
| 103    | MDA70             | Basal   | male   | Caucasian        | 60.11 | High         | yes              | T3NOM0             | 86.46                                                                             | dead                   | Active     | 1-1/2 packs         | 50            |                    |                  |
| 104    | MDA30             | Basal   | male   | Hispanic         | 70.92 | High         | yes              | T4N2M0             | 9.97                                                                              | dead                   | Former     | 4-6 cigarettes      | 30            |                    |                  |
| 105    | MDA63*            | Basal   | male   | Caucasian        | 78.66 | High         | yes              | T2NOM1             | 3.41                                                                              | dead from disease      | Active     | NA                  | 5             |                    |                  |
| 106    | MDA112            | Basal   | male   | Caucasian        | 52.35 | High         | yes              | T3N2M0             | 60.66                                                                             | dead from disease      | Former     | 5 cigarettes        | 27            |                    |                  |
| 107    | MDA33             | Basal   | female | African American | 73.24 | High         | yes              | T3NOM0             | 14.66                                                                             | dead                   | Active     | 1 pack              |               |                    |                  |
| 108    | MDA118            | Basal   | male   | Caucasian        | 68.90 | High         | yes              | T3NOM0             | 6.23                                                                              | dead from other cause  | No-Smoker  | NA                  | 41            |                    |                  |

Supplementary Table 2: Summary of Clinical and Pathological Data (MDACC fresh frozen cohort; n=132)

| Sample | Molecular subtype | Gender     | Race   | Age              | Grade | Invasiveness | Pathologic stage | Follow up (months) | Current status (alive w/o disease, dead from disease, dead from other causes), NA | Smoking status    |            | p53 Mutations    |             |                    |                |
|--------|-------------------|------------|--------|------------------|-------|--------------|------------------|--------------------|-----------------------------------------------------------------------------------|-------------------|------------|------------------|-------------|--------------------|----------------|
|        |                   |            |        |                  |       |              |                  |                    |                                                                                   | Smoking status    | Pack a day | Years of smoking | Nucleotides | Amino Acids        |                |
| 109    | MDA11             | Basal      | female | African American | 78.77 | High         | yes              | T3bN0M0            | 20.33                                                                             | dead from disease | Active     | 1 pack           | 38          |                    |                |
| 110    | MDA31*            | Basal      | female | caucasian        | 63.02 | High         | yes              | T3N0M0             | 59.25                                                                             | alive w/o disease | Former     | NA               | 34          |                    |                |
| 111    | MDA48             | Basal      | male   | Caucasian        | 72.15 | High         | no               | T4N0M0             | 42.92                                                                             | dead              | Former     | NA               | 4           |                    |                |
| 112    | MDA128*           | Basal      | female | Caucasian        | 65.55 | Low          | yes              | TaN0M0             | 18.62                                                                             | dead from disease | Former     | NA               | NA          |                    |                |
| 113    | MDA43*            | Basal      | male   | Caucasian        | 65.48 | High         | yes              | T4N0M0             | 127.48                                                                            | alive w/o disease | No-Smoker  | NA               | NA          |                    |                |
| 114    | MDA57*            | Basal      | female | Caucasian        | 66.39 | High         | yes              | T4N0M1             | 21.31                                                                             | dead from disease | No-Smoker  | NA               | NA          |                    |                |
| 115    | MDA49*            | Basal      | female | Caucasian        | 89.05 | High         | yes              | T2N0M0             | 3.87                                                                              | dead              | Active     | NA               | 30          | c.108G>A, c.215C>G | p.P36=, p.P72R |
| 116    | MDA5*             | Basal      | male   | Caucasian        | 76.88 | High         | yes              | T2N0M1             | 1.70                                                                              | dead from disease | Former     | 1-1/2 packs      | NA          | c.722C>G           | p.S241C        |
| 117    | MDA58*            | Basal      | male   | African American | 66.09 | High         | yes              | T3N0M0             | 8.10                                                                              | dead from disease | No-Smoker  | NA               | NA          | c.991C>T           | p.Q331*        |
| 118    | MDA42             | Basal      | female | African American | 69.19 | High         | yes              | T2N0M0             | 128.79                                                                            | alive w/o disease | No-Smoker  | NA               | NA          |                    |                |
| 119    | MDA91*            | Basal      | female | Hispanic         | 82.83 | High         | yes              | T3N0M0             | 45.08                                                                             | metastasis        | No-Smoker  | NA               | NA          | c.839G>C           | p.R280T        |
| 120    | MDA66             | Basal      | female | African American | 80.43 | High         | yes              | T4N1M1             | 4.59                                                                              | dead from disease | No-Smoker  | NA               | NA          |                    |                |
| 121    | MDA99             | Basal      | male   | Caucasian        | 67.59 | High         | yes              | T3N1M0             | 59.54                                                                             | alive w/o disease | No-Smoker  | NA               | NA          |                    |                |
| 122    | MDA93*            | Basal      | male   | Caucasian        | 80.45 | High         | yes              | T3N0M0             | 3.80                                                                              | cause             | Former     | 50-pack-years    | 25          |                    |                |
| 123    | MDA53*            | Basal      | male   | Caucasian        | 63.35 | High         | yes              | T2N0M0             | 7.34                                                                              | dead from disease | Former     | 2 packs          | NA          |                    |                |
| 124    | MDA61             | Basal      | male   | Caucasian        | 68.36 | High         | yes              | T2N1M0             | 32.82                                                                             | dead              | No-Smoker  | NA               | NA          | c.853G>A           | p.E285K        |
| 125    | MDA68             | Basal      | female | Caucasian        | 58.92 | High         | yes              | T2N1M1             | 6.52                                                                              | dead from disease | Active     | 10 pack-year     | NA          |                    |                |
| 126    | MDA72             | Basal      | female | African American | 77.29 | High         | yes              | T3N0M0             | 109.18                                                                            | dead              | No-Smoker  | NA               | 44          | c.396G>C           | p.K132N        |
| 127    | MDA136*           | Basal      | male   | African American | 82.03 | High         | yes              | T4N0M1             | 4.75                                                                              | dead from disease | Former     | 1 pack           | 30          | c.584T>C           | p.I195T        |
| 128    | MDA109*           | Double neg | female | Hispanic         | 60.67 | High         | yes              | T3N0M0             | 14.89                                                                             | dead              | Former     | 1-1/2 packs      | 35          |                    |                |
| 129    | MDA143            | Double neg | male   | Caucasian        | 73.52 | High         | yes              | T2N0M0             | 94.69                                                                             | disease           | Active     | NA               | NA          |                    |                |
| 130    | MDA73             | Double neg | male   | Caucasian        | 53.79 | High         | yes              | T2N1M0             | 61.54                                                                             | dead              | No-Smoker  | NA               | 40          |                    |                |
| 131    | MDA69             | Double neg | male   | Caucasian        | 62.67 | High         | yes              | T3N1M0             | 249.08                                                                            | dead              | Former     | NA               | NA          |                    |                |
| 132    | MDA34             | Double neg | male   | Caucasian        | 68.12 | Low          | no               | TaN0M0             | 100.52                                                                            | alive w/o disease | Former     | 30-pack-year     | NA          |                    |                |

\* Samples used to prepare routine pathology sections (MDACC FFPE whole-mount IHC cohort; n=74)
