# Supplementary material for: Assessment of Luminal and Basal Phenotypes in Bladder Cancer
Source: PubMed Central journal article supplement (PMC7298008; doi:10.1038/s41598-020-66747-7), 2020-06-16
Supplement: 41598_2020_66747_MOESM4_ESM.pdf [file 41598_2020_66747_MOESM4_ESM.pdf]

Supplementary Table 3: Summary of Clinical and Pathological Data (MDACC FFPE cohort; n=89)

|                  | Luminal/Basal/Do<br>uble neg | Gender | Race             | Age of<br>diagnosis | Stage   | Current status (alive<br>without disease, allive<br>with disease, dead from<br>disease, dead from<br>other causes), NA | Total Follow up time<br>after diagnosis (month) | Smoking status |                |                  |
|------------------|------------------------------|--------|------------------|---------------------|---------|------------------------------------------------------------------------------------------------------------------------|-------------------------------------------------|----------------|----------------|------------------|
|                  |                              |        |                  |                     |         |                                                                                                                        |                                                 | Smoking status | Pack a day     | Years of smoking |
| 1 9464921105_D*  | Luminal                      | male   | Caucasian        | 61.46               | T3N3M0  | dead, NA                                                                                                               | 19.02                                           | Acive          | half pack      | 40               |
| 2 9287078069_C*  | Luminal                      | male   | Caucasian        | 69.05               | T3N0M1  | dead from disease                                                                                                      | 43.90                                           | Former         | NA             | NA               |
| 3 8381670042_J   | Luminal                      | male   | Caucasian        | 81.33               | T2N2M1  | dead from disease                                                                                                      | 18.92                                           | Former         | 15 cigarettes  | 32               |
| 4 9464921093_K   | Luminal                      | male   | Caucasian        | 82.95               | T3N0M0  | dead, NA                                                                                                               | 28.98                                           | No-Smoker      | NA             | NA               |
| 5 9464921101_K*  | Luminal                      | male   | Caucasian        | 63.82               | T3N0M1  | dead from disease                                                                                                      | 13.93                                           | No-Smoker      | NA             | NA               |
| 6 9287078094_A*  | Luminal                      | female | Caucasian        | 62.92               | T3N2M0  | alive w/o disease                                                                                                      | 89.87                                           | No-Smoker      | NA             | NA               |
| 7 9464921106_D*  | Luminal                      | female | Caucasian        | 69.47               | T3N0M0  | died, other                                                                                                            | 32.92                                           | No-Smoker      | NA             | NA               |
| 8 9464921093_J*  | Luminal                      | female | Caucasian        | 68.84               | T3N0M1  | dead, NA                                                                                                               | 33.9                                            | No-Smoker      | NA             | NA               |
| 9 9287078074_J*  | Luminal                      | male   | Caucasian        | 88.48               | T3N3M0  | died, other                                                                                                            | 4.98                                            | No-Smoker      | NA             | NA               |
| 10 9287078069_L* | Luminal                      | male   | Caucasian        | 84.07               | T3N0M1  | dead from disease                                                                                                      | 22.98                                           | Former         | NA             | 22               |
| 11 9464921101_F* | Luminal                      | male   | Caucasian        | 32.29               | T2N0M0  | alive w/o disease                                                                                                      | 85.84                                           | No-Smoker      | NA             | NA               |
| 12 9287078087_K* | Luminal                      | male   | African-American | 80.22               | T3N2M1  | dead from disease                                                                                                      | 16.00                                           | No-Smoker      | NA             | NA               |
| 13 9287078002_K* | Luminal                      | male   | Caucasian        | 82.19               | T3N0M0  | alive w/o disease                                                                                                      | 75.90                                           | No-Smoker      | NA             | NA               |
| 14 9464921105_B* | Luminal                      | male   | Caucasian        | 70.85               | T4N3M0  | dead, NA                                                                                                               | 10.00                                           | Former         | 4-6 cigarettes | 20               |
| 15 8381670042_L  | Luminal                      | male   | Caucasian        | 89.54               | T3N2M1  | dead from disease                                                                                                      | 18.92                                           | No-Smoker      | NA             | NA               |
| 16 9287078021_K* | Luminal                      | male   | Caucasian        | 78.39               | T2N1M1  | dead from disease                                                                                                      | 10.95                                           | No-Smoker      | NA             | NA               |
| 17 9464921100_C  | Luminal                      | male   | Caucasian        | 80.01               | T3N0M0  | dead, NA                                                                                                               | 22.95                                           | Active         | NA             | 62               |
| 18 8381670042_B  | Luminal                      | male   | Caucasian        | 61.09               | T3 N1M1 | dead from disease                                                                                                      | 20.92                                           | Former         | 1 pack         | 15               |
| 19 9464921093_G  | Luminal                      | male   | Caucasian        | 80.10               | T3N0M0  | dead, NA                                                                                                               | 26.98                                           | No-Smoker      | 1 pack L20:L98 | NA               |
| 20 9287078074_H* | Luminal                      | male   | Caucasian        | 54.79               | T3N0M1  | dead from disease                                                                                                      | 21.97                                           | Active         | 1 pack         | 35               |
| 21 9464921106_J* | Luminal                      | male   | Caucasian        | 76.52               | T4N2M1  | dead from disease                                                                                                      | 15.93                                           | No-Smoker      | NA             | NA               |
| 22 9287078002_F* | Luminal                      | male   | Caucasian        | 56.44               | T2N2M1  | died, other                                                                                                            | 34.92                                           | Former         | 2 packs        | 40               |
| 23 9287078074_A* | Luminal                      | male   | Caucasian        | 69.18               | T4N2M0  | dead, NA                                                                                                               | 56.95                                           | No-Smoker      | NA             | NA               |
| 24 9287078094_E* | Luminal                      | female | Caucasian        | 63.26               | T3N0M0  | dead, other                                                                                                            | 16.98                                           | Former         | NA             | 30               |
| 25 9464921106_G* | Luminal                      | male   | Caucasian        | 80.86               | T4N1M0  | dead, NA                                                                                                               | 3.97                                            | Former         | 1 pack         | 21               |
| 26 9464921105_L* | Luminal                      | male   | Caucasian        | 69.31               | T4N3M1  | dead from disease                                                                                                      | 49.90                                           | No-Smoker      | NA             | NA               |
| 27 9464921101_L  | Luminal                      | male   | Caucasian        | 85.53               | T3N0M1  | dead, NA                                                                                                               | 98.82                                           | No-Smoker      | NA             | NA               |
| 28 9464921093_E  | Luminal                      | male   | Caucasian        | 60.27               | T3N1M0  | alive w/o disease                                                                                                      | 60.85                                           | No-Smoker      | NA             | NA               |
| 29 9464921100_F* | Luminal                      | male   | Caucasian        | 63.51               | T2N0M1  | dead from disease                                                                                                      | 12.98                                           | No-Smoker      | NA             | NA               |
| 30 9287078069_A* | Luminal                      | female | Caucasian        | 81.22               | T3N0M0  | dead, other                                                                                                            | 80.82                                           | Former         | 15 cigarettes  | 43               |
| 31 9287078069_D* | Luminal                      | male   | Caucasian        | 70.39               | T2N0M0  | died, other                                                                                                            | 5.02                                            | Active         | 90- pack- year | NA               |
| 32 9464921101_J* | Luminal                      | male   | Caucasian        | 52.85               | T3N2M1  | dead from disease                                                                                                      | 12.98                                           | Former         | NA             | 34               |
| 33 9287078069_H* | Luminal                      | male   | Caucasian        | 65.60               | T3N1M0  | alive w/o disease                                                                                                      | 78.92                                           | Active         | 2 packs        | 45               |
| 34 9287078102_L* | Luminal                      | male   | Caucasian        | 58.82               | T3N0M1  | dead from disease                                                                                                      | 34.92                                           | Active         | 2 packs        | 38               |
| 35 9287078074_F* | Luminal                      | male   | Caucasian        | 70.95               | T2N0M0  | NA, foreign pt                                                                                                         | 18.95                                           | Active         | 2 packs        | 48               |
| 36 9287078002_C* | Luminal                      | male   | Caucasian        | 71.52               | T2N0M0  | alive w/o disease                                                                                                      | 73.87                                           | Active         | NA             | 50               |
| 37 9464921101_A* | Luminal                      | male   | Hispanic         | 65.95               | T3N2M0  | alive with disease                                                                                                     | 79.84                                           | Active         | 80-pack-year   | NA               |
| 38 9287078002_L* | Luminal                      | female | Caucasian        | 75.94               | T3N0M0  | dead, NA                                                                                                               | 5.02                                            | No-Smoker      | NA             | NA               |
| 39 9464921101_G* | Luminal                      | male   | Caucasian        | 75.41               | T4N3M1  | dead from disease                                                                                                      | 13.97                                           | No-Smoker      | NA             | NA               |
| 40 9287078074_G* | Luminal                      | male   | Caucasian        | 82.29               | T4N0M1  | alive with disease                                                                                                     | 8.00                                            | No-Smoker      | NA             | NA               |
| 41 9464921100_B* | Luminal                      | female | Caucasian        | 75.72               | T3N0M0  | alive w/o disease                                                                                                      | 51.87                                           | No-Smoker      | NA             | NA               |
| 42 9287078021_C* | Luminal                      | male   | Caucasian        | 71.30               | T3N3M1  | NA, foreign pt                                                                                                         | 20.95                                           | No-Smoker      | NA             | NA               |
| 43 9464921106_C* | Luminal                      | male   | Caucasian        | 43.90               | T3N0M0  | alive w/o disease                                                                                                      | 82.92                                           | No-Smoker      | NA             | NA               |
| 44 9287078021_G* | Luminal                      | female | Caucasian        | 61.04               | T3N0M0  | NA, foreign pt                                                                                                         | 1.93                                            | Active         | NA             | 1                |
| 45 9464921106_B* | Luminal                      | male   | Caucasian        | 63.82               | T3N0M0  | dead, other                                                                                                            | 40.95                                           | Active         | 70-pack-year   | NA               |
| 46 9287078021_J* | Luminal                      | male   | Caucasian        | 78.05               | T3N0M1  | dead from disease                                                                                                      | 22.92                                           | Former         | 1/2 pack       | 10               |

Supplementary Table 3: Summary of Clinical and Pathological Data (MDACC FFPE cohort; n=89)

|                  | Luminal/Basal/Do<br>uble neg | Gender | Race             | Age of<br>diagnosis | Stage  | Current status (alive<br>without disease, allive<br>with disease, dead from<br>disease, dead from<br>other causes), NA | Total Follow up time<br>after diagnosis (month) | Smoking status |                  |                  |
|------------------|------------------------------|--------|------------------|---------------------|--------|------------------------------------------------------------------------------------------------------------------------|-------------------------------------------------|----------------|------------------|------------------|
|                  |                              |        |                  |                     |        |                                                                                                                        |                                                 | Smoking status | Pack a day       | Years of smoking |
| 47 9464921100_E* | Basal                        | male   | Caucasian        | 67.30               | T4N0M1 | dead from disease                                                                                                      | 22.00                                           | No-Smoker      | NA               | NA               |
| 48 9287078094_D* | Basal                        | male   | Caucasian        | 66.59               | T3N0M1 | dead, probably bl ca                                                                                                   | 18.00                                           | No-Smoker      | NA               | NA               |
| 49 9287078002_A* | Basal                        | female | Caucasian        | 66.33               | T2N0M0 | dead, NA                                                                                                               | 8.00                                            | No-Smoker      | NA               | NA               |
| 50 9287078102_F* | Basal                        | female | Caucasian        | 50.46               | T3N3M1 | dead from disease                                                                                                      | 12.95                                           | Active         | two packs        | NA               |
| 51 9287078069_K* | Basal                        | male   | Caucasian        | 90.08               | T3N1M1 | dead from disease                                                                                                      | 23.97                                           | No-Smoker      | NA               | NA               |
| 52 9287078087_J* | Basal                        | female | Caucasian        | 64.48               | T4N0M1 | dead from disease                                                                                                      | 34.98                                           | Active         | 30-pack-year     | NA               |
| 53 9287078087_D* | Basal                        | male   | Caucasian        | 70.34               | T3N2M0 | dead from disease                                                                                                      | 13.97                                           | Active         | 25 cigarettes    | 42               |
| 54 9464921106_L* | Basal                        | male   | Caucasian        | 71.88               | T3N2M0 | alive w/o disease                                                                                                      | 70.92                                           | Former         | 16-pack-year     | NA               |
| 55 9287078074_E* | Basal                        | male   | Caucasian        | 62.56               | T3N0M1 | dead from disease                                                                                                      | 21.97                                           | Former         | 1 pack           | 20               |
| 56 9287078102_K* | Basal                        | female | African-American | 76.00               | T3N0M0 | dead, other                                                                                                            | 3.02                                            | No-Smoker      | NA               | NA               |
| 57 9464921100_D* | Basal                        | female | Caucasian        | 81.03               | T3N0M0 | dead from disease                                                                                                      | 14.98                                           | No-Smoker      | NA               | NA               |
| 58 9464921105_G* | Basal                        | female | Hispanic         | 50.14               | T3N0M0 | dead, other                                                                                                            | 3.02                                            | No-Smoker      | NA               | NA               |
| 59 9287078074_C* | Basal                        | female | African-American | 73.20               | T3N0M1 | dead from disease                                                                                                      | 15.02                                           | Active         | 1pack            | 27               |
| 60 9464921100_I  | Basal                        | female | Hispanic         | 82.32               | T3N0M0 | dead from disease                                                                                                      | 22.95                                           | No-Smoker      | NA               | NA               |
| 61 9287078087_B* | Basal                        | male   | Caucasian        | 64.21               | T3N1M1 | dead from disease                                                                                                      | 8.95                                            | No-Smoker      | NA               | NA               |
| 62 9287078102_E* | Basal                        | female | African-American | 73.33               | T3N0M0 | dead, NA                                                                                                               | 32.00                                           | Active         | 1 pack           | 50               |
| 63 9287078087_I* | Basal                        | male   | Caucasian        | 49.54               | T2N0M0 | dead from disease                                                                                                      | 65.80                                           | Active         | 1/2 pack         | 30               |
| 64 9287078021_L* | Basal                        | male   | Caucasian        | 69.63               | T3N3M1 | dead from disease                                                                                                      | 11.97                                           | No-Smoker      | NA               | NA               |
| 65 9464921106_A* | Basal                        | male   | Caucasian        | 80.45               | T3N0M0 | dead, NA                                                                                                               | 3.02                                            | Former         | 50-pack years    | NA               |
| 66 9464921106_J* | Basal                        | male   | Caucasian        | 82.05               | T2N0M0 | alive w/o disease                                                                                                      | 72.82                                           | No-Smoker      | NA               | NA               |
| 67 9287078087_G* | Basal                        | female | Caucasian        | 65.30               | T4N3M1 | dead from disease                                                                                                      | 34.98                                           | Former         | NA               | NA               |
| 68 9464921093_B* | Basal                        | male   | Caucasian        | 66.08               | T4N1M0 | NA, no info                                                                                                            | 7.02                                            | Former         | NA               | 7                |
| 69 9287078021_I* | Basal                        | male   | Caucasian        | 78.22               | T4N0M0 | dead from disease                                                                                                      | 26.89                                           | Former         | 10-pack-year     | NA               |
| 70 8381670042_D  | Basal                        | male   | Caucasian        | 73.02               | T2N0M0 | dead, NA                                                                                                               | 99.84                                           | No-Smoker      | NA               | NA               |
| 71 9287078094_L* | Basal                        | female | Caucasian        | 83.13               | T2N0M0 | dead from disease                                                                                                      | 3.02                                            | No-Smoker      | NA               | NA               |
| 72 9287078021_E* | Basal                        | male   | Caucasian        | 76.64               | T3N0M1 | alive w/o disease                                                                                                      | 99.84                                           | No-Smoker      | NA               | NA               |
| 73 8381670042_H* | Basal                        | male   | Caucasian        | 62.21               | T3N3M1 | dead from disease                                                                                                      | 57.93                                           | Active         | 25 packs         | 40               |
| 74 8381670051_B  | Basal                        | male   | African-American | 44.28               | T3N2M0 | alive w/o disease                                                                                                      | 46.89                                           | No-Smoker      | NA               | NA               |
| 75 9287078096_E* | Basal                        | male   | Caucasian        | 65.70               | T2N0M1 | dead, sepsis                                                                                                           | 170.69                                          | Former         | 2 packs          | 10               |
| 76 9287078094_B* | Double negative              | male   | Caucasian        | 74.71               | T3N0M1 | dead from disease                                                                                                      | 33.90                                           | Former         | 40 packs         | NA               |
| 77 9287078096_F* | Double negative              | male   | Caucasian        | 59.82               | T2N1M1 | dead from disease                                                                                                      | 45.87                                           | Former         | 2 packs          | 22               |
| 78 8381670051_D  | Double negative              | female | Caucasian        | 72.27               | T2N0M1 | dead from disease                                                                                                      | 15.93                                           | No-Smoker      | NA               | NA               |
| 79 9464921093_F  | Double negative              | male   | Caucasian        | 85.41               | T2N0M0 | alive w/o disease                                                                                                      | 60.89                                           | No-Smoker      | NA               | NA               |
| 80 9287078069_B* | Double negative              | male   | Caucasian        | 61.67               | T3N0M0 | alive with disease                                                                                                     | 172.62                                          | Former         | 1 pack           | 9                |
| 81 8381670051_F  | Double negative              | male   | Caucasian        | 77.39               | T3N0M0 | dead, NA                                                                                                               | 61.90                                           | No-Smoker      | NA               | NA               |
| 82 9287078069_J* | Double negative              | male   | Hispanic         | 64.57               | T3N3M1 | dead from disease                                                                                                      | 23.97                                           | Former         | 1 pack           | 16               |
| 83 9287078094_H* | Double negative              | male   | Caucasian        | 55.25               | T2N1M0 | alive w/o disease                                                                                                      | 122.72                                          | No-Smoker      | NA               | NA               |
| 84 9287078069_G* | Double negative              | male   | Caucasian        | 70.43               | T2N0M1 | dead from disease                                                                                                      | 75.87                                           | Active         | 1-1/2 packs      | 60               |
| 85 9464921101_E* | Double negative              | female | Caucasian        | 60.72               | T3N3M1 | dead, NA                                                                                                               | 14.95                                           | Former         | 10 pack per year | 20               |
| 86 9287078102_J* | Double negative              | male   | Caucasian        | 61.25               | T2N0M1 | dead from disease                                                                                                      | 8.95                                            | Former         | 2 packs          | 35               |
| 87 9464921093_J  | Double negative              | female | Caucasian        | 68.97               | T2N0M1 | alive w/o disease                                                                                                      | 86.85                                           | No-Smoker      | NA               | NA               |
| 88 9287078102_A* | Double negative              | male   | Caucasian        | 63.76               | T3N1M1 | dead from disease                                                                                                      | 35.93                                           | No-Smoker      | NA               | NA               |
| 89 9287078096_H* | Double negative              | male   | Caucasian        | 75.93               | T3N2M1 | dead from disease                                                                                                      | 23.97                                           | Active         | 20 cigarettes    | 9                |

\* Samples used to prepare TMA (MDACC TMA FFPE cohort; n=74)
