# Supplementary material for: Assessment of Luminal and Basal Phenotypes in Bladder Cancer
Source: PubMed Central journal article supplement (PMC7298008; doi:10.1038/s41598-020-66747-7), 2020-06-16
Supplement: 41598_2020_66747_MOESM5_ESM.pdf [file 41598_2020_66747_MOESM5_ESM.pdf]

**Supplementary Table 4. List of Marker Genes Used in the Development of BLT Score**

|    | <b>Luminal</b> | <b>Basal</b> |
|----|----------------|--------------|
| 1  | CYP2J2*        | CD44 *       |
| 2  | ERBB2*         | CDH3*        |
| 3  | ERBB3*         | KRT1*        |
| 4  | FGFR3*         | KRT14        |
| 5  | FOXA1          | KRT16*       |
| 6  | GATA3*         | KRT5*        |
| 7  | GPX2*          | KRT6A*       |
| 8  | KRT18          | KRT6B        |
| 9  | KRT19*         | KRT6C*       |
| 10 | KRT20*         | SFN*         |
| 11 | KRT7           | S100A8       |
| 12 | KRT8*          | PI3          |
| 13 | PPARG          | S100A7       |
| 14 | XBP1           | CSTA*        |
| 15 | PEPD           | SERPINB2     |
| 16 | ACADM          | CKS2*        |
| 17 | MGST1*         | CCNB1*       |
| 18 | CYP4B1         | CCNA2        |
| 19 | ACAA1          | KIF23        |
| 20 | CEBPA          | PMAIP1*      |
| 21 | ACOX1          |              |
| 22 | ACSL1*         |              |
| 23 | SCNN1G*        |              |
| 24 | ELOVL6*        |              |
| 25 | HES1*          |              |
| 26 | SDC1*          |              |
| 27 | IGFBP3         |              |
| 28 | GDF15*         |              |

\*Denotes markers selected for the linear discriminant analysis (LDA) by a least absolute shrinkage and selection operator (LASSO)
