# Supplementary material for: Assessment of Luminal and Basal Phenotypes in Bladder Cancer
Source: PubMed Central journal article supplement (PMC7298008; doi:10.1038/s41598-020-66747-7), 2020-06-16
Supplement: 41598_2020_66747_MOESM10_ESM.pdf [file 41598_2020_66747_MOESM10_ESM.pdf]

**Supplementary Table 1. Summary of Clinical and Pathological Data for the TCGA and MDACC Cohorts.**

| Stage                                                             | Subtype         | Gender F/M | Total | Age, yr,<br>mean $\pm$ SD |
|-------------------------------------------------------------------|-----------------|------------|-------|---------------------------|
| <b>TCGA cohort</b>                                                |                 |            |       |                           |
| Invasive<br>(T2 and higher)                                       | Luminal         | 48/164     | 212   | 68.3 $\pm$ 11.0           |
|                                                                   | Basal           | 56/123     | 179   | 68.0 $\pm$ 10.1           |
|                                                                   | Double negative | 3/14       | 17    | 65.6 $\pm$ 10.2           |
| <b>MD Anderson fresh frozen tissue cohort</b>                     |                 |            |       |                           |
| Noninvasive<br>(Ta-Tis)                                           | Luminal         | 8/24       | 32    | 64.8 $\pm$ 12.1           |
| Invasive<br>(T1 and higher)                                       | Luminal         | 11/49      | 60    | 67.4 $\pm$ 10.6           |
|                                                                   | Basal           | 12/23      | 35    | 69.6 $\pm$ 10.6           |
|                                                                   | Double negative | 1/4        | 5     | 63.8 $\pm$ 7.5            |
| <b>MD Anderson formalin-fixed paraffin-embedded tissue cohort</b> |                 |            |       |                           |
| Invasive<br>(T2 and higher)                                       | Luminal         | 8/38       | 46    | 70.2 $\pm$ 11.6           |
|                                                                   | Basal           | 11/18      | 29    | 69.2 $\pm$ 11.0           |
|                                                                   | Double Neg      | 3/11       | 14    | 68.0 $\pm$ 8.4            |

F, female; M, male; yr, year; SD, standard deviation
